# Supplementary material for: Inter-Individual Responses to a Blueberry Intervention across Multiple Endpoints
Source: MDPI journal article supplement (doi:10.3390/nu16060895), 2024-03-20
Supplement: s1 [file s1]

Note to participants:

Kindly please note that following listed “purple foods” should be avoided during your participation in this study.

|                                                                                                                                                                                                                                                   |
|---------------------------------------------------------------------------------------------------------------------------------------------------------------------------------------------------------------------------------------------------|
| <b>Berries</b>                                                                                                                                                                                                                                    |
| <ol style="list-style-type: none"><li>1. Blueberries</li><li>2. Blackberries</li><li>3. Blackcurrant</li><li>4. Concord grapes (dark/purple)</li><li>5. Cherries</li><li>6. Chokeberries</li><li>7. Raspberries</li><li>8. Strawberries</li></ol> |
| <b>Other fruits</b>                                                                                                                                                                                                                               |
| <ol style="list-style-type: none"><li>1. Plums</li><li>2. Prunes</li><li>3. Raisins</li></ol>                                                                                                                                                     |
| <b>Veggies</b>                                                                                                                                                                                                                                    |
| <ol style="list-style-type: none"><li>1. Beetroot</li><li>2. Aubergine</li><li>3. Red cabbages</li><li>4. Red onions</li></ol>                                                                                                                    |
| <b>Juices</b>                                                                                                                                                                                                                                     |
| All smoothie/juices blended from above foods                                                                                                                                                                                                      |
| <b>Alcohol</b>                                                                                                                                                                                                                                    |
| <ol style="list-style-type: none"><li>1. Red wine</li></ol>                                                                                                                                                                                       |
| <b>Other foods</b>                                                                                                                                                                                                                                |
| <ol style="list-style-type: none"><li>1. Pastry, cake or biscuits containing cherries and berries</li><li>2. Cherries/berries containing muesli and fruit flakes</li></ol>                                                                        |
